# Supplementary material for: The pharmacodynamic and mechanistic foundation for the antineoplastic effects of GFH009, a potent and highly selective CDK9 inhibitor for the treatment of hematologic malignancies
Source: PubMed Central journal article supplement (PMC10732257; doi:10.18632/oncotarget.28543), 2023-12-20
Supplement: oncotarget-14-28543-s001.pdf [file oncotarget-14-28543-s001.pdf]

## The pharmacodynamic and mechanistic foundation for the antineoplastic effects of GFH009, a potent and highly selective CDK9 inhibitor for the treatment of hematologic malignancies

### SUPPLEMENTARY MATERIALS

**Supplementary Table 1: Inhibitory action of GFH009 on other CDK family members**

| Various CDK/<br>cognate cyclin pairs tested | Remaining enzymatic activity (%) after<br>exposure to GFH009 at a concentration of<br>1 $\mu$ M/10 $\mu$ M | Selectivity vs. CDK9 |
|---------------------------------------------|------------------------------------------------------------------------------------------------------------|----------------------|
| Cdc7/cyclinB1                               | 75/47                                                                                                      | >100                 |
| CDK1/cyclin B                               | 97/50                                                                                                      | >1000                |
| CDK2/cyclin A                               | 80/51                                                                                                      | >1000                |
| CDK2/cyclin E                               | 63/27                                                                                                      | >100                 |
| CDK3/cyclin E                               | 74/39                                                                                                      | >100                 |
| CDK4/cyclin D3                              | 70/41                                                                                                      | >100                 |
| CDK5/p25                                    | 79/43                                                                                                      | >100                 |
| CDK5/p35                                    | 66/43                                                                                                      | >100                 |
| CDK6/cyclin D3                              | 85/58                                                                                                      | >1000                |
| CDK7/cyclin H/MAT1                          | 67/19                                                                                                      | >100                 |
| CDK12/cyclin K                              | 94/86                                                                                                      | >1000                |
| CDK13/cyclin K                              | 93/88                                                                                                      | >1000                |
| CDK14/cyclin Y                              | 70/39                                                                                                      | >100                 |
| CDK16/cyclin Y                              | 23/5                                                                                                       | <100                 |
| CDK17/cyclin Y                              | 30/7                                                                                                       | <100                 |
| CDK18/cyclin Y                              | 53/12                                                                                                      | >100                 |

**Supplementary Table 2: Results of GPCR agonist action testing of GFH009 administered at a maximum dose of 12  $\mu$ M**

Agonist action against GPCR type shown below

| <b>Target</b>              | <b>% Agonist Effect @ Max Dose<br/>(12 <math>\mu</math>M)</b> |
|----------------------------|---------------------------------------------------------------|
| 5-HT1A (serotonin)         | -0.33                                                         |
| 5-HT1B (serotonin)         | -51.01                                                        |
| 5-HT2A (serotonin)         | -1.68                                                         |
| 5-HT2B (serotonin)         | 4.55                                                          |
| $\alpha$ 1a (adrenoceptor) | 4.58                                                          |
| $\alpha$ 2a (adrenoceptor) | -3.87                                                         |
| AD2 (adenosine)            | 21.7                                                          |
| b1 (adrenoceptor)          | 4.53                                                          |
| b2 (adrenoceptor)          | -0.6                                                          |
| CB1 (cannabinoid)          | -0.7                                                          |
| CB2 (cannabinoid)          | 0.23                                                          |
| CCKa                       | -0.4                                                          |
| D1 (dopamine)              | -1.49                                                         |
| D2 (dopamine)              | 3.66                                                          |
| ETA (endothelin)           | -0.08                                                         |
| H1 (histamine)             | 1.55                                                          |
| H2 (histamine)             | -0.03                                                         |
| M1 (muscarinic Ach)        | -2.18                                                         |
| M2 (muscarinic Ach)        | -0.63                                                         |
| M3 (muscarinic Ach)        | 0.49                                                          |
| op-d (opioid)              | -0.98                                                         |
| op-k (opioid)              | 21.57                                                         |
| op-m (opioid)              | 0.71                                                          |
| V1A (vasopressin)          | 0.59                                                          |

**Supplementary Table 3: Results of off-target inhibitory action testing of GFH009 administered at a maximum dose of 10  $\mu$ M****Competitive antagonist activity against GPCR type shown below**

| <b>Target</b>       | <b>% Inhibitory Effect @ Max Dose<br/>(10 <math>\mu</math>M)</b> |
|---------------------|------------------------------------------------------------------|
| 5-HT1A (serotonin)  | 12.31                                                            |
| 5-HT1B (serotonin)  | 4.71                                                             |
| 5-HT2A (serotonin)  | -7.10                                                            |
| 5-HT2B (serotonin)  | -24.98                                                           |
| a1a (adrenoceptor)  | 68.39                                                            |
| a2a (adrenoceptor)  | 5.16                                                             |
| AD2 (adenosine)     | -13.58                                                           |
| b1 (adrenoceptor)   | 30.48                                                            |
| b2 (adrenoceptor)   | -3.46                                                            |
| CB1 (cannabinoid)   | -9.21                                                            |
| CB2 (cannabinoid)   | -8.86                                                            |
| CCKa                | 16.26                                                            |
| D1 (dopamine)       | 1.10                                                             |
| D2 (dopamine)       | 10.34                                                            |
| ETA (endothelin)    | -0.32                                                            |
| H1 (histamine)      | 12.37                                                            |
| H2 (histamine)      | -18.49                                                           |
| M1 (muscarinic Ach) | 98.78                                                            |
| M2 (muscarinic Ach) | 95.69                                                            |
| M3 (muscarinic Ach) | 99.12                                                            |
| op-d (opioid)       | -15.46                                                           |
| op-k (opioid)       | 11.54                                                            |
| op-m (opioid)       | 20.94                                                            |
| V1A (vasopressin)   | -1.57                                                            |
